# Supplementary material for: Scaling up delivery of HIV services in Africa through harnessing trends across global emerging innovations
Source: Frontiers journal article supplement (doi:10.3389/frhs.2023.1198008), 2023-10-31
Supplement: Table_1.XLSX [file Table_1.XLSX]

## Sheet: Apps  
	Innovation Landscape for HIV services technologies
	No	Name	Company Name	Country	Description	Category	Link	Type
	1	HIV&Hepatitis Drug Guid‪e‬	Lluita contra la Sida Foundation	Spain	This application provides instant and easy access to regularly updated information about specific HIV, HCV and HBV mutations related to resistance to antiviral drugs. Both in vitro and in vivo information is provided for each specific drug resistance mutation selected by users.	Strategic information	https://apps.apple.com/pl/app/hiv-hepatitis-drug-guide/id572254208	Google or Play Store
	2	Liverpool HIV iChart	Liverpool Drug Interactions Group	Uganda	Liverpool HIV iChart provides info on drug interactions for doctors and patients. It uses an easy-to-understand traffic light system (red, yellow, and green) for its recommendations	Access services	https://play.google.com/store/apps/details?id=com.liverpooluni.icharthiv&hl=en	Google or Play Store
	3	ClinicalInfo Drug Database	Office of AIDS Research	United States of America	The ClinicalInfo HIV/AIDS Drug Database app provides mobile access to information about drugs approved to treat HIV infection, drugs that are used to treat other infections or diseases common to people living with HIV, and also HIV/AIDS-related drugs that are being studied in clinical trials. This app is provided free from the National Library of Medicine at the National Institutes of Health	Strategic information	HIV/AIDS Drugs | NIH	Google or Play Store
	4	RxSaver	RxSaver, Inc.	United States of America	RxSaver finds prescription drug coupons instantly for pharmacies near you. RxSaver is free to use. No membership or sign in required.	Access services	https://play.google.com/store/apps/details?id=com.lowestmed.android&hl=en&gl=US	Google or Play Store
	5	WellRx	Medical Security Card Company, LLC.	United States of America	With the free ScriptSave® WellRx app, you can search for savings on prescription medications, get discounts at pharmacies near you, and save an average of 60% on your Rx medications!	Access services	https://play.google.com/store/apps/details?id=com.wellrx&hl=en&gl=US	Google or Play Store
	6	Oral PrEP Tool app	WHO and Jhpiego	Switzerland	The Oral PrEP Tool app makes it easy to view the WHO PrEP Implementation Tool on smartphones and tablets, online or offline, wherever you are	Strategic information	HIV Oral PrEP Tool – Apps on Google Play	Google or Play Store
	7	WHO HTS Info: new app	World Health Organisation	Switzerland	WHO HTS Info” makes it easy to view WHO guidance on HIV testing on your smartphone or tablet, whether you’re online or offline.	Strategic information	WHO HTS Info – Apps on Google Play	Google or Play Store
	8	Care4Today app	Johnson & Johnson Health and Wellness Solutions	United States of America	It can be tough to juggle more than one prescription. Care4Today allows users to set up customer reminders to help manage their prescriptions throughout the day	Treatment & Management	https://www.care4today.com/	Google or Play Store
	9	Medici app	Medici Technologies, LLC	United States of America	This app allows individuals to text with their doctor and ask questions about symptoms, medications, and other concerns without making an in-office appointment. This also allows doctors to handle questions through the app before or between appointments so that face-to-face appointments can be more efficient.	Strategic information	https://www.medici.md/get-medici	Google or Play Store
	10	Doctor On Demand app	Doctor On Demand, Inc	United States of America	Doctor On Demand lets you see a variety of different health specialists through the app, allowing you to get health advice, basic medical exams, diagnoses, prescriptions, and other medical care quickly around the clock.	Access services	https://play.google.com/store/apps/details?id=com.doctorondemand.android.patient&hl=en&gl=US	Google or Play Store
	11	Digital Pharmacist app	Digital Pharmacist Inc	United States of America	This app aims to make prescriptions less confusing by taking the guessing and fear out of prescriptions and can improve medication adherence.	Treatment & Management	https://www.digitalpharmacist.com/	Google or Play Store
	12	Medisafe Medication Management app	MEDISAFE	United States of America	With Medisafe, you get personalized reminders for each of your medications and vital drug interaction warnings*. Stay connected to your caregivers through real-time missed medication alerts	Treatment & Management	https://www.medisafeapp.com/	Google or Play Store
	13	NACO AIDS APP	National Health Portal-MoHFW	United States of America	The app spreads awareness amongst masses with the help of its gamification feature.	Strategic information	https://play.google.com/store/apps/details?id=com.naco.nhp&hl=en&gl=US	Google or Play Store
	14	The Locator app	U.S. Department of Health & Human Services	United States of America	The HIV Services Locator is a location-based search tool that allows you to search for HIV testing, PrEP, care and treatment, and other support services	Access services	https://play.google.com/store/apps/details?id=com.icf.hiv.locator&hl=en_ZA&gl=US	Google or Play Store
	15	MyLife+ HIV app	ViiV Healthcare Pty Lt	Australia	Be empowered and take control of your health and wellbeing with easy to use trackers and tools for blood results, medication, and quality of life tracking.	Access services	https://mylifeplus.com.au	Google or Play Store
	16	Everlywell HIV Test +App	Everlywell, Inc	United States of America	This at-home test will check for the sexually transmitted infection HIV, all from the privacy of your own home.	Diagnostics	https://www.everlywell.com/products/hiv-test/?utm_source=affiliate&utm_medium=affiliate&utm_campaign=CJ	Google or Play Store
	17	CheckMate app	Instant Checkmate	United States of America	Is an a mobile app that allows consumers to order at-home and in-lab tests for sexually transmitted diseases (STD) has been made available by CheckMate Healthcare.	Access services	https://play.google.com/store/apps/details?id=com.instantcheckmate.app&hl=en&gl=US	Google or Play Store
	18	mHealth app	mHealth Tanzania Partnership team	Indonesia	It a self-learning tool is effective in increasing HIV-related knowledge and behavior, and access to services with strong acceptability by the community.	Behavioural change	https://www.cdc.gov/globalhivtb/who-we-are/success-stories/success-story-pages/tanzania-mhealth.html	Google or Play Store
	19	Daily Charge App	Gilead Sciences Android Build Account	United States of America	Daily Charge is an everyday support app with educational articles, pill reminders, and a lab results tracker.	Access services	https://play.google.com/store/apps/details?id=com.gilead.dailycharge&hl=en&gl=US	Google or Play Store
	20	Liverpool HIV iChart	Liverpool Drug Interactions Group	Uganda	Liverpool HIV iChart provides info on drug interactions for doctors and patients. It uses an easy-to-understand traffic light system (red, yellow, and green) for its recommendations	Access services	https://play.google.com/store/apps/details?id=com.liverpooluni.icharthiv&hl=en	Google or Play Store
	21	Positive Peers App.	The Metro Health System	United States of America	The app and a companion social media and website serve to engage young people in holistic HIV care within a private, stigma-free, supportive online community	Behavioural change	https://targethiv.org/sites/default/files/supporting-files/spns-smi-positive-peers-monograph-508_0.pdf	Google or Play Store
	22	SMARTEE	Howard Brown Health Center (HBHC	United States of America	Social Media App for Retention, Treatment, Engagement and Education among HIV patients	Strategic information	https://targethiv.org/sites/default/files/supporting-files/spns-smi-hbh-smartee_monograph_508_0.pdf	Google or Play Store
	23	weCare	Wake Forest University	United States of America	This app uses established social media to communicate with MSM and transgender women ages 16-34 to demystify HIV treatment and help engage and support clients in care.	Strategic information	https://targethiv.org/sites/default/files/supporting-files/spns-smi-wecare_manual_508.pdf	Google or Play Store
	24	HIV Care Tools	Aids Education and Training center	United States of America	HIV Care Tools features free point‐of‐care tools for clinicians caring for people with – or at risk for – HIV infection. Quick guides provide essential information for HIV testing, pre‐exposure prevention (PrEP), post‐exposure prevention (PEP), rapid start of antiretroviral treatment (ART) for those testing HIV positive, and resources to help pay for HIV medications.	Strategic information	https://play.google.com/store/apps/details?id=ucsf.aetc.app	Google or Play Store
	25	HIV Dating App For POZ Singles	PozMatch	CANADA	Launched in 1998. PozMatch is the world's first and original HIV / AIDS Dating and Social Community where you'll feel welcome and understood. People just like you who are interested in meeting others for friendship, companionship and of course, love. PozMatch is an all-inclusive HIV / AIDS dating site. It's for everyone regardless of sexual orientation, race, religion, and gender.	Strategic information	https://play.google.com/store/apps/details?id=com.pozmatch.hivdating	Google or Play Store

## Sheet: Websites 
	Innovation Landscape for HIV services technologies
	No	Name	Company Name	Country	Description	Category	Link	Type
	1	ABON™ HIV 1/2/O Tri-Line Human Immunodeficiency Virus Rapid Test Device	ABON Biopharm (Hangzhou) Co. Ltd. Hangzhou, PR China	China	ABON HIV 1/2/O Tri-Line, is a rapid immunochromatographic assay, HIV 1/2/O tri-line for the qualitative detection of antibodies to HIV-1, including subtype O, and HIV-2.	Diagnostics	https://supply.unicef.org/s0003563.html	Website
	2	Alere Determine™ HIV-1/2	Abbott Alere Medical Co. Ltd, Matsudo, Japan	Japan	The Determine™ HIV-1/2 test detects a wide variety of HIV subtypes (refer to IFU). This versatility helps healthcare workers across the world diagnose individual infection, monitor HIV prevalence, and enable fast linkage to care. This is a rapid HIV screening test used by billions and proven by practice.	Diagnostics	https://www.globalpointofcare.abbott/en/product-details/determine-hiv-1-2.html	Website
	3	FacingAIDS app	UNM Truman Health Services	United States of America	This application raises awareness and reduces the stigma associated with HIV/AIDS. It is a powerful platform that is designed to help those who are struggling with the idea of getting tested for HIV, as well as for those who have received a recent diagnosis.	Behavioural change	https://www.hiv.gov/blog/facing-aids-goes-mobile	Website
	4	Luv Box kit	US Clinical Trials Registry	United States of America	This is a box that include personal hygiene products and HIV self-testing kit as strategy to promote uptake of HIV testing among young people.	Access services	https://ichgcp.net/nl/clinical-trials-registry/NCT04070287	Website
	5	Bili Vibes kit	US Clinical Trials Registry	United States of America	This involves a program called "Bili" that leverages community youth events such as football matches as a strategy to promote the uptake of HIV self-testing among young people.	Access services	https://ichgcp.net/nl/clinical-trials-registry/NCT04070287	Website
	6	BeterDoc kits	US Clinical Trials Registry	United States of America	BeterDoc Safety kits includes HIV self-testing kit, location and phone number to the health centers in the community as a strategy to promote update of HIV self-testing among young people.	Access services	https://ichgcp.net/nl/clinical-trials-registry/research/list?intr=BeterDoc	Website
	7	IUNGO	Ondo state	Nigeria	This intervention involves using a program utilizes community vocational skills training centers to promote uptake of HIV self-testing among young people.	Access services	https://www.smartpatients.com/trials/NCT04070287	Website
	8	Oraquick HIV Self Test	OraSure Technologies, Inc.	United States of America	This is an oral swab in home HIV test.	Diagnostics	http://www.oraquick.com/what-is-oraquick/how-oral-testing-works	Website
	9	BeterDoc	Oyo state	Nigeria	This intervention involve using "BeterDoc Safety kits" that includes HIV self-testing kit, location and phone number to the health centers in the community as a strategy to promote update of HIV self-testing among young people	Access services	https://www.smartpatients.com/trials/NCT04070287	Website
	10	Bili Vibes	Enugu state	Nigeria	The intervention involves using a program program called "Bili" that leverages community youth events such as football matches as a strategy to promote the uptake of HIV self-testing among young people	Access services	https://www.smartpatients.com/trials/NCT04070287	Website
	11	Luv Box	Lagos state	Nigeria	The intervention involves using "Luv Box" a box that include personal hygiene products and HIV self-testing kit as strategy to promote uptake of HIV testing among young people	Access services	https://www.smartpatients.com/trials/NCT04070287	Website
	12	SMART Pack	Lagos state	Nigeria	This involves using "SMART Pack" a HIV self-testing kit to promote uptake of HIV self-testing among young people at community centers	Access services	https://www.smartpatients.com/trials/NCT04070287	Website
	13	AIDSinfo apps	U.S. Department of Health and Human Services	United States of America	The app includes six HIV treatment guidelines developed by expert panels on the treatment of HIV infection and related opportunistic infections in adults, adolescents, and children and on the management of perinatal HIV infection.	Strategic information	https://www.hiv.gov/blog/aidsinfo-guidelines-app-provides-access-to-hiv-treatment-information-at-the-point-of-care	Website
	14	WHO HIV Tx app.	World Health Organisation	Switzerland	All WHO's consolidated guidelines for HIV treatment and care are found in the app.	Strategic information	WHO HIV Tx – Apps on Google Play	Website
	15	GoodRx	GoodRx, Inc	United States of America	The website helps users research the best prices for prescriptions.	Access services	https://www.goodrx.com/	Website
	16	Talkspace app	Talkspace	United States of America	It is a tool for patients to ‘see’ their licensed therapist without traveling to an office. Patients can use the messaging feature to ask questions/seek support or schedule video sessions for in-depth conversations.	Access services	https://www.talkspace.com/	Website
	17	DIAQUICK Rapid Tests	Dialab GmbH	Austria	DIAQUICK Rapid Tests are HIV 1/2 antibodies combined detection. Additionally The DIAQUICK HIV 1&2 Ab Cassette is a rapid, qualitative test for the detection of antibodies to all isotypes (IgG, IgM, IgA) specific to HIV-1	Diagnostics	DIAQUICK Rapid Tests .::. DIALAB GmbH	Website
	18	ABON™ HIV 1/2/O Tri-Line Human Immunodeficiency Virus Rapid Test Device	ABON Biopharm (Hangzhou) Co. Ltd. Hangzhou, PR China	China	ABON HIV 1/2/O Tri-Line, is a rapid immunochromatographic assay, HIV 1/2/O tri-line for the qualitative detection of antibodies to HIV-1, including subtype O, and HIV-2.	Diagnostics	https://supply.unicef.org/s0003563.html	Website
	19	Alere HIV Combo	Abbott Alere Medical Co. Ltd, Matsudo, Japan	Japan	Alere™ HIV Combo test detects more acute infections compared to 2nd and 3rd generation tests. This helps close the window period and enables increased case finding at a time when individuals are highly infectious.	Diagnostics	https://www.globalpointofcare.abbott/en/product-details/alere-hiv-combo.html	Website
	20	Determine HIV Early Detect (former Alere HIV Combo)	Abbott Alere Medical Co. Ltd, Matsudo, Japan	Japan	Detects both HIV-1/2 antibodies and free HIV-1 p24 antigen. This 4th generation test has the ability to identify HIV earlier than 2nd and 3rd generation antibody-only tests.1 It enables health care providers to diagnose HIV infection earlier allowing individuals to seek medical care sooner.	Diagnostics	https://www.globalpointofcare.abbott/en/product-details/determine-1-2-ag-ab-combo.html	Website
	21	Diagnostic kit for HIV (1+2) antibody (colloidal gold) V2	Shanghai Kehua Bioengineering Co., Ltd	China	Diagnostic Kit for HIV (1+2) Antibody (Colloidal Gold) V2 is an in vitro, visually read test for the qualitative determination of antibodies against HIV-1 and HIV-2 in human serum, plasma, venous and capillary whole blood. This product is intended for use as an aid to detect antibodies against HIV (1+2) from individuals suspected to be infected by HIV. It is intended to be used by laboratory prof…	Diagnostics	https://supply.unicef.org/s0003731.html	Website
	22	"DIAQUICK" HIV Plus	Dialab GmbH, Austria	Austria	The DIAQUICK HIV Plus is a rapid chromatographic immunoassay with a double antigen system for the qualitative detection of antibodies to HIV-1 and/or HIV-2 in human serum or plasma. It is intended to be used as a screening test and as an aid in the diagnosis of infection with HIV. Any reactive specimen with the DIAQUICK HIV Plus must be confirmed with alternative testing method(s).	Diagnostics	https://irtech.pl/wp-content/uploads/2020/07/IFU_05_HIV_Plus_rev01_en_de_es_fr_pt.pdf	Website
	23	DPP HIV 1/2 Assay	Chembio Diagnostic Systems,Medford, USA	United States of America	DPP® HIV 1/2 Assay is a single-use, immunochromatographic test for the detection of antibodies to Human Immunodeficiency Virus Types 1 and 2 (HIV 1/2) in oral fluid, fingerstick whole blood, venous whole blood, serum, or EDTA plasma specimens. Chembio DPP® HIV 1/2 Assay is intended for use at point-of-care to aid in the diagnosis of infection with HIV-1 and HIV-2.	Diagnostics	DPP® HIV 1/2 Assay USA – Chembio Diagnostics, Inc.	Website
	24	EXACTO© PRO TEST HIV	Biosynex SA, Strasbourg, France	France	A rapid immunochromatographic test for the qualitative detection of antibodies against HIV-1 and HIV-2 in whole blood, serum or plasma.	Diagnostics	https://www.medicalexpo.com/prod/biosynex/product-79552-868308.html	Website
	25	First Response® HIV 1-2-0 Card Test	Premier Medical Corporation, Nani Daman, India	India	First Response® HIV 1-2-0 Card Test is a qualitative in vitro diagnostic test (immunochromatographic rapid diagnostic test) for the detection of antibodies of all classes specific to HIV-1 (including Group O) and HIV-2 in human serum, plasma and venous or capillary whole blood.	Diagnostics	First Response® HIV 1-2.O Card Test (Version 2.0) (premiermedcorp.com)	Website
	26	Genie Fast HIV 1/2	Bio-Rad Laboratories, Marnes La Coquette France and Steenvoorde, France	France	Genie™ Fast HIV 1/2 Assay is a rapid immunochromatographic assay intended for the detection of antibodies to HIV-1 and HIV-2 in capillary whole blood, venous whole blood, serum or plasma human specimens. It is a qualitative assay used as an aid to diagnose HIV infection. The test is suitable for use in multi-test algorithms designed for the validation of rapid HIV test results.	Diagnostics	NOTICE (bio-rad.com)	Website
	27	Hexagon HIV	Human Gesellschaft für Biochemica und Diagnostica mbH Germany	Germany	3rd generation rapid test for the detection of antibodies to HIV. HIV-1 and HIV-2 antibodies are indicated with separate test lines	Diagnostics	Infectious Diseases - Rapid Screening Tests - HUMAN Diagnostics Worldwide	Website
	28	HIV 1/2 STAT-PAK Dipstick	Chembio Diagnostic Systems, Medford, USA	United States of America	HIV 1/2 STAT-PAK® DIPSTICK Assay A rapid, qualitative screening assay for the detection of antibodies to HIV 1 & 2 in human serum, plasma or whole blood.	Diagnostics	https://pdf.medicalexpo.com/pdf/chembio-diagnostic-systems-inc/hiv-1-2-stat-pak-dipstick-assay/92285-214359.html	Website
	29	HIV 1/2 STAT-PAK™	Chembio Diagnostic Systems, Medford, USA	United States of America	A WHO Prequalified, rapid point-of-care assay for the detection of HIV-1 and HIV-2 antibodies in fingerstick whole blood, venous whole blood, serum or plasma.	Diagnostics	https://chembio.com/products/hiv-1-2-stat-pak-assay-international/	Website
	30	INSTI HIV-1/2 Antibody Test Kit	BioLytical Laboratories, Richmond, Canada	Canada	For the detection of antibodies to Human Immunodeficiency Virus Type 1 and/or Type 2 (HIV-1/HIV-2) in human venipuncture whole blood, fingerstick blood, or plasma specimens.	Diagnostics	https://www.fda.gov/vaccines-blood-biologics/approved-blood-products/insti-hiv-1hiv-2-antibody-test	Website
	31	MERISCREEN HIV 1-2 WB	Meril Diagnostics Pvt. Ltd., Vapi+F56, India	India	2 WB Test is a single use, qualitative, screening, in-vitro diagnostic immunochromatography assay and used for detection of antibodies (IgG, IgA and IgM) specific to HIV-1 and HIV-2 in human fingerstick whole blood, venous whole blood, serum or plasma specimens	Diagnostics	https://www.merillife.com/medical-devices/diagnostics/rapids/critical-infectious-diseases/meriscreen-hiv-1-2-wb	Website
	32	Multispot HIV-1/HIV-2 Rapid Test	Bio-Rad Laboratories, Marnes La Coquette, France and Steenvoorde, France	France	For the detection and differentiation of circulating antibodies associated with HIV-1 and HIV-2 in human plasma and serum, as an aid in the diagnosis of infection with HIV-1 and/or HIV-2	Diagnostics	https://www.fda.gov/vaccines-blood-biologics/approved-blood-products/multispot-hiv-1hiv-2-rapid-test	Website
	33	Multisure HIV Rapid Test	MP Biomedicals Asia Pacific Singapore	Singapore	The MULTISURE ® HIV Rapid Test is intended as a rapid diagnostic test, developed to detect antibodies specific to HIV-1 gp120, HIV-1 gp41, HIV-1 p24 (also react with HIV-2) and HIV-2 gp36 antigens in human serum, plasma, finger pricked whole blood or whole blood with anti-coagulants.	Diagnostics	https://www.mpbio.com/0743030020-multisure-hiv-rt-20t	Website
	34	ONE STEP Anti-HIV(1&2 ) Test	InTec PRODUCTS, INC. 332 Xinguang Road, Xinyang Ind. Area, Haicang, Xiamen, 361022, P.R. China	China	This test is a colloidal gold enhanced, rapid immunochromatographic assay for qualitative detection of antibodies to Human Immunodeficiency Virus (HIV) in human whole blood (venous and fingerstick), serum or plasma.	Diagnostics	https://supply.unicef.org/s0003849.html	Website
	35	Wondfo® One Step HIV1/2 Whole Blood/Serum/Plasma Test	Guangzhou Wondfo Biotech Co. Ltd, 8 Lizhishan Road, Science City, Luogang District, Guangzhou, 510663, P.R. China	China	This test is intended for use by trained users (in either laboratory or point-of-care settings), and is a qualitative, screening, in vitro diagnostic test for detection of HIV 1/2 antibodies in human venous whole blood, fingerstick whole blood, serum or plasma, aid to diagnosis of HIV infection.	Diagnostics	https://supply.unicef.org/s0003851.html	Website
	36	OraQuick® HIV-1/2 - Rapid Antibody Test and OraQuick® ADVANCE Rapid HIV-1/2 Antibody Test	OraSure Technologies Bethlehem, USA (manufactured in Thailand)	United States of America	Added labeling claim for the detection of HIV-2 antibodies in oral fluid and a change in the name of the device to OraQuick ADVANCE Rapid HIV-1/2 Antibody Test	Diagnostics	https://www.fda.gov/vaccines-blood-biologics/approved-blood-products/oraquick-advance-rapid-hiv-12-antibody-test	Website
	37	Rapid Test for Antibody to HumanImmunodeficiency Virus (HIV) (Colloidal Gold Device)	BeijingWantai Biological Pharmacy Enterprise Co.	China	Is a single use, rapid device for qualitative detection of antibodies against Human Immunodeficiency Viruses (HIV) 1+2 in human serum, plasma or whole blood specimens	Diagnostics	https://portal-uat.who.int/pqweb/sites/default/files/PQDx_0005-005-00_ColloidalGoldDevice_v4.pdf	Website
	38	STANDARD Q HIV 1/2 Ab 3-Line Test	SD Biosensor Inc (16, Deogyeong-daero, 1556 beon-gil, Yeongtong-gu, Suwon-si, Gyeonggi-do 16690 Republic of Korea)	Korea	STANDARD Q HIV 1/2 Ab 3-Line performs qualitative analysis by detecting antibodies specific to HIV-1 (including Group O) and HIV-2 in serum, plasma and whole blood using immunochromatography. With a simple test method, HIV infection status can be discriminated, and with its high sensitivity and specificity, the screening test result can be obtained within 10 minute	Diagnostics	https://supply.unicef.org/s0003972.html	Website
	39	SD Bioline HIV-1/2 3.0	Standard Diagnostics, (Giheung-gu,Yongin-si, Korea)	Korea	SD BIOLINE HIV-1/2 3.0 test is an immunochromatographic assay for the differential and qualitative detection of all isotypes(IgG, IgM, IgA) antibodies specific to HIV-1 including subtype O and HIV-2 simultaneously, in human serum, plasma or whole blood.	Diagnostics	https://www.globalpointofcare.abbott/en/product-details/sd-bioline-hiv-1-2-3-0.html	Website
	40	SURE CHECK® HIV 1/2 ASSAY	Chembio Diagnostic Systems,Medford, USA	United States of America	SURE CHECK HIV Self-Test is a qualitative, single-use in-vitro diagnostic self-test for detection of antibodies to Human Immunodeficiency Virus Types 1 and 2 (HIV 1/2) in fingerstick whole blood. The SURE CHECK HIV Self-Test is intended for use by untrained lay users in a privatesetting as a self-test to aid in the diagnosis of HIV infection	Diagnostics	Chembio SURE CHECK HIV 1/2 Assay | FDA	Website
	41	Toyo Anti-HIV 1/2	Turk Lab Turkey	Turkey	Qualitative detection of antibodies generated against IgG, IgA and IgM of HIV virus.Detects antibodies generated against all HIV subtypes (HIV Type 1, Type 2, Type O). Detects antibodies generated against p24 Antigen. High stability, specificity and sensitivity	Diagnostics	Toyo diagnostic kits - Integralgrp (integral-scientific.com)	Website
	42	Uni-Gold HIV	Trinity Biotech Manufacturing Ltd, Bray, Ireland	Ireland	For use with whole blood, serum, or plasma	Diagnostics	Uni-Gold HIV 1/2, kit/100 (unicef.org)	Website
	43	VIKIA HIV 1/2	bioMérieux SA Marcy L’Etoile, France	France	VIKIA® HIV 1/2 is a CE-marked 3rd generation rapid test based on the immunochromatography technique for the detection of antibodies to Human Immunodeficiency Virus (HIV) in human serum, plasma or whole blood	Diagnostics	VIKIA® HIV 1/2 | bioMérieux South Africa (biomerieux.co.za)	Website
	44	Mylan HIV Self-Test (former Atomo HIV Self-Test)	Atomo Diagnostics Pty Ltd, Leichhardt, Australia	Australia	Is one of the world’s only integrated self-test device, providing greater convenience, ease-of-use and infield diagnostic performance when compared to other multi-component HIV test kits.	Diagnostics	https://www.mylanez2uz.com/	Website
	45	INSTI® HIV Self Test	BioLytical Laboratories, Richmond, Canada	Canada	INSTI® HIV Self Test is designed as a single-use HIV test kit that allows you to get results in the comfort of your home and at a time that works best for you. Sample, pour and read your results immediately. It’s that easy	Diagnostics	https://www.insti.com/hiv-self-test/	Website
	46	EXACTO© TEST HIV	Biosynex SA, Strasbourg, France	France	HIV self-testing involves collecting your own specimen (oral fluid or blood) and using a rapid HIV test kit. You perform the whole test yourself, including reading and interpreting the test result.Self-testing is sometimes called ‘home testing’, because people often do it at home. The World Health Organization (WHO) recommends that HIV self-testing should be offered alongside existing HIV testing…	Diagnostics	https://www.aidsmap.com/about-hiv/how-accurate-self-testing-hiv	Website
	47	Geenius HIV 1/2 Confirmatory assay	Bio-Rad Laboratories, Marnes La Coquette, France and Bio-Rad Laboratories, Steenvoorde, France	France	The Bio-Rad Geenius™ HIV 1/2 Confirmatory Assay is a single-useimmunochromatographic test forthe confirmation and differentiation of individual antibodies to Human Immunodeficiency Virus Types 1and 2 (HIV-1 and HIV-2) in fingerstick whole blood, venous whole blood, serum or plasma samples	Diagnostics	https://www.bio-rad.com/webroot/web/pdf/inserts/CDG/en/883601_EN.pdf	Website
	48	Genscreen™ HIV-1 Ag Confirmatory Assay	Bio-Rad 3, boulevard Raymond Poincaré 92430 Marnes-laCoquette - France	France	Genscreen™ HIV-1 Ag Confirmatory Assay is intended for the confirmation of HIV-1 p24 antigen in serum, plasma or cell culture supernatant specimens found to be repeatedly reactive in the Genscreen™ HIV-1 Ag Assay	Diagnostics	https://www.bio-rad.com/webroot/web/pdf/inserts/CDG/en/883570_EN.pdf	Website
	49	INNO-LIA™ HIV I/II Score	Fujirebio Europe N.V., Ghent, Belgium	Belgium	Line immunoassay for the confirmation and discrimination of antibodies to HIV-1, HIV-1 group O and HIV-2 in human serum and plasma.	Diagnostics	https://extranet.who.int/pqweb/sites/default/files/PQDx_0203-073-00_InnoLiaHIV_Score_v2.pdf	Website
	50	MP Diagnostics HIV Blot 2.2	MP Biomedicals Asia Pacific, Singapore	Singapore	HIV BLOT 2.2 is a qualitative enzyme immunoassay for the in vitro detection of antibodies to human immunodeficiency virus type 1 (HIV-1) and type 2 (HIV-2) in human serum or plasma. It is intended for use as a more specific supplemental test on human serum or plasma specimens found repeatedly reactive using screening procedures such as ELISA.	Diagnostics	https://www.mpbio.com/0711031-108-hiv-blot-2-2	Website
	51	NEW LAV BLOT I	Bio-Rad Laboratories Steenvoorde, France	France	The NEW LAV-BLOT II kit is intended to the detection of human anti-HIV-2 antibodies in serum or plasma by immunoblotting in order to confirm a positive anti-HIV-2 response and specify its antigenic specificity within the scope of AIDS diagnosis	Diagnostics	https://commerce.bio-rad.com/webroot/web/pdf/inserts/CDG/en/883572_EN.pdf	Website
	52	NEW LAV BLOT II	Bio-Rad Laboratories Steenvoorde, France	France	The NEW LAV-BLOT II kit is intended to the detection of human anti-HIV-2 antibodies in serum or plasma by immunoblotting in order to confirm a positive anti-HIV-2 response and specify its antigenic specificity within the scope of AIDS diagnosis	Diagnostics	https://www.bio-rad.com/webroot/web/pdf/inserts/CDG/en/883573_EN.pdf	Website
	53	ARCHITECT HIV Ag/Ab Combo Reagent Kit (CLIA)	Abbott Laboratories	Germany	The ARCHITECT HIV Ag/Ab Combo assay is a chemiluminescent microparticle immunoassay (CMIA) for the simultaneous qualitative detection of human immunodeficiency virus (HIV) p24 antigen and antibodies to HIV type 1 (HIV-1 group M and group O) and/or type 2 (HIV-2) in human serum and plasma (EDTA and heparin).	Diagnostics	https://www.fda.gov/media/116836/download	Website
	54	Abbott PRISM HIV Ag/Ab Combo Assa	Abbott Diagnostics, Wiesbaden, Germany	Germany	The ABBOTT PRISM HIV Ag/Ab Combo assay is an in vitro chemiluminescent immunoassay (ChLIA) for the simultaneous qualitative detection of HIV p24 antigen and/or antibodies to human immunodeficiency virus type 1 and/or type 2 (HIV-1/HIV-2) in human serum or plasma	Diagnostics	https://www.ilexmedical.com/files/PDF/HIV_Prism.pdf	Website
	55	AiD anti-HIV 1+2 ELISA	Beijing Wantai Biological Pharmacy Enterprise Co., Ltd.	China	AiDTM anti-HIV 1+2 ELISA is an enzyme-linked immunosorbent assay (ELISA) intended for qualitative detection of antibodies to Human Immunodeficiency Viruses (HIV) type 1 (group M - O) or type 2 in human serum or plasma samples	Diagnostics	AiD anti-HIV 1+2 ELISA, kit/96 (unicef.org)	Website
	56	apDia HIV Ab & Ag Elisa	apDia bvba, Raadsherenstraat 3, B2300 Turnhout, Belgium	Belgium	The apDia HIV Ag/Ab ELISA is a 4th generation solid phase Enzyme-Linked ImmunoSorbent Assay (ELISA) using a mixture of antigens and antibodies for the in vitro diagnostic screening in human serum or plasma of antibodies to HIV-1 (all subtypes, including HIV-0), HIV-2 and HIV-P24 antigen.	Diagnostics	https://curegroup.net/download/HIV.pdf	Website
	57	GS HIV Combo Ag/Ab EIA	Bio-Rad Laboratories, Steenvoorde, France	france	: The GS HIV Combo Ag/Ab EIA is an enzyme immunoassay kit for the simultaneous qualitative detection of Human Immunodeficiency Virus (HIV) p24 antigen and antibodies to HIV Type 1 (HIV-1 groups M and O) and HIV Type 2 (HIV-2) in human serum or plasma	Diagnostics	https://www.bio-rad.com/webroot/web/pdf/cdg/literature/P-143.pdf	Website
	58	HIV 1&2 Ag/Ab, Double Ag&Ab Sandwich Principle	Dialab GmbH, Austria	Austria	The DAI HIV 1+2 Ag/Ab ELISA is an enzyme-linked immunosorbent assay (ELISA) intended for qualitative detection of antigens and/or antibodies to Human Immunodeficiency Viruses (HIV) type 1 (group M - O) and/or type 2 in human serum or plasma samples.	Diagnostics	https://www.rapidtest.com/pdf/HIV%20Ag&Ab_1520-12%20(2016-06-08).pdf	Website
	59	HIV 1+2 Ab Elisa	Axiom GmbH Am Jahnplatz 5 68642 Bürstadt Germany	Germany	The RecombiLISA HIV 1+2 Ab ELISA is a solid phase enzyme-linked immunosorbent assay for the qualitative detection of anti-HIV-1 including subtype O and anti-HIV-2 antibodies (including isotype IgG, IgM and IgA) in human serum or plasma. It detects subtypes of HIV with high sensitivity which ensures accurate blood	Diagnostics	https://ctkbiotech.com/product/hiv-12-ab-elisa-test/	Website
	60	Murex HIV - 1.2.0	DiaSorin, Dartford, United Kingdon	United Kingdon	Double Antigen ELISA for total Ab detection (bridge test)	Diagnostics	https://www.diasorin.com/sites/default/files/allegati_prodotti/m0870004228-a_murex_hiv-1.2.pdf	Website
	61	Murex HIV Ag/Ab Combination	DiaSorin Dartford, United Kingdon	United Kingdon	Murex HIV Ag/Ab Combination is an enzyme immunoassay for the simultaneous qualitative detection of Human Immunodeficiency Virus (HIV) p24 antigen and antibodies to HIV type 1 (HIV-1 group O) and HIV type 2 (HIV-2) in human serum or plasma. This kit is intended as an aid in the diagnosis of HIV-1 and/or HIV-2 infection	Diagnostics	https://supply.unicef.org/s0003560.html	Website
	62	LIAISON XL	DiaSorin S.p.A., Saluggia (Vercelli), Italy	Italy	LIAISON® XL is a fully automated chemiluminescence analyzer, performing complete sample processing (sample pre-dilutions, sample and reagent dispensing, incubations, wash processes, etc.) as well as measurement and evaluation	Diagnostics	https://www.diasorin.com/en/immunodiagnostic-solutions/systems/clia-systems/liaisonr-xl	Website
	63	INNOTEST HIV Ag mAb	Fujirebio Europe N.V., Ghent, Belgium	Belgium	INNOTEST HIV Antigen mAb (96T and 480T) are enzyme immunoassay (EIA) for the qualitative detection of p24 core antigens of the human immunodeficiency virus type 1 (HIV-1), HIV-1 group O, and type 2 (HIV-2) in human serum, plasma, or cell culture supernatant	Diagnostics	INNOTEST® HIV Antigen mAb | Fujirebio	Website
	64	VITROS Immunodiagnostic Products HIV Combo Reagent Pack	Ortho-Clinical Diagnostics, Bridgend, United Kingdom	United Kingdom	VITROS Immunodiagnostic Products HIV Combo Reagent Pack is for the simultaneous qualitative detection of antibodies to Human Immunodeficiency Virus types 1, including group M and O, and/or 2 (anti-HIV-1 and anti-HIV-2) and HIV p24 antigen in human serum and plasma (heparin and EDTA) in adults, pregnant women, adolescents and children (as young as 2 years of age), using the VITROS ECi/ECiQ Immunod…	Diagnostics	https://www.fda.gov/vaccines-blood-biologics/approved-blood-products/vitros-immunodiagnostic-products-hiv-combo-reagent-pack-vitros-immunodiagnostic-products-hiv-combo	Website
	65	Roche Elecsys HIV Combi	Roche Diagnostics, Mannheim, Germany	Germany	The Elecsys® HIV combi PT is a highly sensitive and specific fourth generation electrochemiluminescence immunoassay (ECLIA) for the qualitative detection of HIV-1 p24 antigen and antibodies to HIV-1, including group O, and HIV-2 in human serum or plasma	Diagnostics	https://diagnostics.roche.com/gb/en/products/params/elecsys-hiv-combi-pt.html	Website
	66	Aquios CL flow cytometer	Beckman Coulter Life Sciences Miami, FL, USA (instrument site) and Hialeah, FL, USA (reagent site)	United States of America	The AQUIOS CL Flow Cytometer is a benchtop instrument capable of combining automated sample preparation and cellular analysis in a compact system.	Diagnostics	https://www.beckman.com/flow-cytometry/clinical-flow-cytometers/aquios-cl/b39101	Website
	67	BD FACSCount™ Instrument System with FACSCount™ Control Kit and BD FACSCount™ Reagent Kit	Becton, Dickinson and Company, BD Biosciences, San Jose, USA	United States of America	The BD FACSCount™ system is a proven, turnkey system designed to provide absolute and percentage results of CD4 T lymphocytes to stage progression.	Diagnostics	https://www.bdbiosciences.com/en-us/products/instruments/flow-cytometers/clinical-cell-analyzers/facscanto	Website
	68	BD Tritest CD3/CD4/CD45	Becton, Dickinson and Company, BD Biosciences, San Jose, USA	United States of America	BD Tritest™ CD3 fluoresceinisothiocyanate (FITC)/CD4 phycoerythrin (PE)/CD45 peridinin chlorophyll protein(PerCP) is a three-color direct immunofluorescence reagent for use with a suitably equipped flow cytometer to identify and determine the percentages and absolute counts of mature human Tlymphocytes (CD3+) and helper/inducer(CD3+CD4+) T-lymphocyte subsets in erythrocyte-lysed whole blood	Diagnostics	https://www.bdbiosciences.com/content/dam/bdb/products/global/reagents/flow-cytometry-reagents/clinical-diagnostics/multicolor-cocktails-and-kits-ivd-ce-ivds/342444_base/pdf/23-5327.pdf	Website
	69	BD Tritest CD4/CD8/CD3	Becton, Dickinson and Company, BD Biosciences, San Jose, USA	United States of America	BD Tritest™ CD4 fluorescein isothiocyanate (FITC)/CD8 phycoerythrin (PE)/CD3 peridinin chlorophyll protein (PerCP) is a three-color directimmunofluorescence reagent. It is used with BD Trucount™ absolute count tubesfor identifying and determining absolute counts in cells/µL of mature humanT lymphocytes (CD3+), helper/inducer (CD3+CD4+) T lymphocytes, and suppressor/cytotoxic (CD3+CD8+)T lymphocyt…	Diagnostics	https://www.bdbiosciences.com/en-us/products/reagents/flow-cytometry-reagents/clinical-diagnostics/multicolor-cocktails-and-kits-ivd-ce-ivds/cd4-fitc-cd8-pe-cd3-percp.340298	Website
	70	BD Multitest CD3/CD8/CD45/CD4	Becton, Dickinson and Company, BD Biosciences, San Jose, USA	United States of America	BD Multitest™ CD3/CD8/CD45/CD4 is a four-color direct immunofluorescence reagent for use with a suitably equipped flow cytometer to identify and determine the percentages and absolute counts of mature human T lymphocytes (CD3+), suppressor/cytotoxic (CD3+CD8+) T-lymphocyte subsets, and helper/inducer (CD3+CD4+ T-lymphocyte subsets in erythrocyte-lysed whole blood.	Diagnostics	https://www.chemicalbook.com/ChemicalProductProperty_EN_CB9357312.htm	Website
	71	PIMA CD4 Test	Abbott Alere Technologies GmbH, Jena, Germany	Germany	Pima™ CD4 Cartridges are a breakthrough technology that, in combination with the Pima™ Analyser, help to provide absolute CD4 lymphocyte (T-helper cell) counts	Diagnostics	https://extranet.who.int/pqweb/content/public-report-pima%E2%84%A2-cd4-test-pqdx-0099-032-00	Website
	72	Alinity m HIV-1	Abbott Molecular Inc Des Plaines IL, USA	United States of America	The Alinity m HIV-1 assay is an in vitro reverse transcription-polymerase chain reaction (RT-PCR) assay to detect and quantitate Human Immunodeficiency Virus type 1 (HIV-1) RNA using plasma, serum and dried blood spot (DBS)	Diagnostics	https://www.molecular.abbott/int/en/products/infectious-disease/alinity-m-hiv-1-assay	Website
	73	Abbott Real Time HIV-1 Qualitative (Manual and m2000sp)	Abbott Molecular Inc Des Plaines IL, USA	United States of America	The Abbott RealTime HIV-1 Qualitative is an in vitro amplification assay for the qualitative detection of Human Immunodeficiency Virus Type 1 (HIV-1) nucleic acids from human plasma and dried blood spots (DBS).	Diagnostics	https://www.molecular.abbott/int/en/products/infectious-disease/realtime-hiv-1-qualitative	Website
	74	HIV ELISA kit	Diagnostic Automation Inc	United States of America	HIV1 p24 ELISA Kit (ab218268) is a single-wash 90 min sandwich ELISA designed for the quantitative measurement of HIV1 p24 protein in human serum, plasma, cell culture supernatant, and cell and tissue extract samples.	Diagnostics	http://www.rapidtest.com/index.php?i=HIV-ELISA-kit&id=165&cat=16	Website
	75	OraQuick® HIV-1/2 Rapid Antibody Test	OraSure Technologies	United States of America	The OraQuick In-Home HIV Test is a rapid self-administered over-the-counter (OTC) test and tests for HIV in oral fluid.	Diagnostics	https://oraquick.com/	Website
	76	Atomo HIV Self Test	Atomo	Australia	The tests require only a small drop of blood from the fingertip, and give an accurate result in just 15 minute	Diagnostics	https://atomodiagnostics.com/hiv-self-test/	Website
	77	Autotest VIH.	Infographic WHO	france	Autotest VIH® is intended to be used by people who want to know their HIV status. The risk of infection remains real.	Diagnostics	http://autotest-vih.eu/en/	Website
	78	INSTI HIV Self Test	African Society for Laboratory Medicine	Netherlands	INSTI HIV Self Test is a qualitative immunoassay that uses blood to detect HIV-1 and HIV-2 antibodies.	Diagnostics	https://aslm.org/product/insti-hiv-self-test/	Website
	79	Simplitude ByMe HIV Test	simplitudebyme.	United Kingdom and Germany	It tests for HIV in 15 minutes. These particular tests all rely on a blood sample taken from the fingertip	Diagnostics	https://simplitudebyme.com/wp-content/uploads/sites/9/2020/04/Simplitude_Instructions-for-use-EN.pdf	Website
	80	SD Bioline HIV/Syphilis Duo	Abbott -	United States of America	The SD BIOLINE HIV/Syphilis Duo test is a solid phase immunochromatographic assay for the qualitative detection of antibodies to all isotypes(IgG, IgM, and IgA) specific to HIV-1/2 and/or Treponema pallidum (TP) simultaneously in human serum, plasma, or whole blood.	Diagnostics	https://www.globalpointofcare.abbott/en/product-details/sd-bioline-hiv-syphilis-duo.html	Website
	81	Uni-Gold™ Recombigen® HIV**	Trinity Biotech Manufacturing Ltd	United States of America	Indicated as a single use rapid immunoassay for the qualitative detection of antibodies to HIV-1 and/or HIV-2 in human serum, plasma and whole blood (venipuncture and fingerstick). Uni-Gold™ HIV is a single use rapid immunoassay, for the qualitative detection of antibodies to HIV-1 and HIV-2 in serum, plasma and whole blood (venous and fingerstick).	Diagnostics	https://www.fda.gov/media/114893/download#:~:text=Uni%2DGold%E2%84%A2%20Recombigen%C2%AE%20HIV%2D1%2F2%20was,regions%20of%20the%20HIV%20virus.	Website
	82	Signal HIV Rapid Test	Arkray Healthcare pvt.ltd	India	Signal ® HIV is a Flow through Immuno-dot Test for Qualitative Detection of Antibodies to HIV 1+2 in serum or Plasma.	Diagnostics	http://www.arkray.co.jp/english/upload/docs/Signal%20HIV.pdf	Website
	83	RightSign HIV 1.2.O Rapid Test Cassette	Hangzhou Biotest Biotech Ltd		A rapid test for the diagnosis of Human Immunodeficiency Virus to detect antibodies to HIV type 1, type 2 and Subtype O qualitatively in whole blood, serum or plasma	Diagnostics	Right Sign HIV Test (praxisdienst.com)	Website
	84	Reveal® G2 Rapid HIV Test	MedMira Laboratories Inc	Canada	The Reveal™ G2 Rapid HIV-1 Antibody Test is a single use, qualitative immunoassay to detect antibodies to Human Immunodeficiency Virus Type 1 (HIV-1) in human serum or plasma. The Reveal™ G2 Rapid HIV-1 Antibody Test is intended for use as a point-of-care test to aid in the diagnosis of infection with HIV -1.	Diagnostics	https://www.fda.gov/files/vaccines%2C%20blood%20%26%20biologics/published/Package-Insert---MedMira-Reveal-G2-Rapid-HIV-1-Antibody-Test.pdf	Website
	85	RAPID 1-2-3® HEMA EXPRESS™	Hema Diagnostic Systems, LLC	United States of America	The RAPID 1-2-3® HEMA® EXPRESS HIV 1/2 P24Ab uses whole blood, serum, or plasma as a test sample with test results appearing as quickly as 10 minutes. Through its simple, user-friendly design, the RAPID 1-2-3® HEMA® EXPRESS HIV 1/2 P24Ab eliminates many of the difficulties generally associated with rapid cassette testing, including the uncontrolled transfer of a potentially infected test sample.	Diagnostics	https://www.accesswire.com/453486/Hema-Diagnostic-Systems-Announces-the-Introduction-of-the-New-RAPID-1-2-3-HEMA-EXPRESS-HIV-12-P24-Ab-Test	Website
	86	INSTI™ HIV-1/HIV-2 Antibody	bioLytical	Canada	The INSTI® HIV-1/HIV-2 Antibody Test is a rapid in vitro qualitative test for the detection of antibodies to Human Immunodeficiency Virus Type 1 and Type 2 in human whole blood, fingerstick blood, serum or plasma.	Diagnostics	https://www.insti.com/hiv-test/	Website
	87	Aware™ HIV-1/2 BSP	Food and Drug Administration, National Institute	India	The Calypte® Aware™ HIV-1/2 BSP test is a single use, qualitative, visually read, in vitro immunoassay for the detection of antibodies to Human Immunodeficiency Virus Type 1 (HIV-1) and Type 2 (HIV-2) in human whole blood (finger-stick), serum, or plasma specimens. It is intended for use as a point-of-care aid in the clinical diagnosis of HIV infection. This test may be used as a component of a m…	Diagnostics	http://www.sumitbiomedical.com/product5.html	Website
	88	Alere Determine™ HIV-1/2 Ag/Ab Combo Rapid Test Kit	Abbott	United States of America	It is intended for use as a point-of-care test to aid in the diagnosis of infection with HIV-1 and HIV-2, including an acute HIV-1 infection, and may distinguish acute HIV-1 infection from established HIV-1 infection when the specimen is positive for HIV-1 p24 antigen and negative for anti-HIV-1 and anti-HIV-2 antibodies.	Diagnostics	https://www.fda.gov/vaccines-blood-biologics/approved-blood-products/alere-determine-hiv-12-agab-combo	Website
	89	ABON™ HIV 1/2/O Tri-line HIV Rapid Test Device (Whole Blood/Serum/Plasma)	UNICEF	United States of America	ABON HIV 1/2/O Tri-Line, is a rapid immunochromatographic assay, HIV 1/2/O tri-line for the qualitative detection of antibodies to HIV-1, including subtype O, and HIV-2.	Diagnostics	https://supply.unicef.org/s0003762.html	Website
	90	ABON™ HIV 1/2/O Tri-Line Human Immunodeficiency Virus Rapid Test Device	ABON Biopharm (Hangzhou) Co. Ltd. Hangzhou, PR China	China	ABON HIV 1/2/O Tri-Line, is a rapid immunochromatographic assay, HIV 1/2/O tri-line for the qualitative detection of antibodies to HIV-1, including subtype O, and HIV-2.	Diagnostics	https://supply.unicef.org/s0003563.html	Website
	91	AccuPower® HIV-1 Quantitative RT-PCR Kit	Abbott Alere Technologies GmbH, Germany Loebstedter Str. 103- 105 07749 Jena	Germany	AccuPower® HIV Quantitative RT-PCR Kit is an in vitro diagnostic kit designed for the quantification of HIV-1 RNA in human samples such as serum and EDTA-plasma through real-time PCR.	Diagnostics	https://eng.bioneer.com/20-hiv-1211.html	Website
	92	ExiStation™ Universal Molecular Diagnostic System	Bioneer Corporation, 8- 11, Munpyeongseo-ro, Daedeok-gu, Daejeon, 34302, Republic of Korea	korea	The ExiStation™ management software is the heart of the ExiStation™ Universal Molecular Diagnostic System. Input sample, patient and target information, and the software will guide you on where to place the samples within the Prep cartridges. The software will control both the ExiPrep™16 Dx units and the Exicycler™ 96, and analyzes the data after a run is completed. The following explains the var…	Diagnostics	https://eng.bioneer.com/20-a-2200.html	Website
	93	Social and behavioural change Implementation Kit	National STD/AIDS Control Programme	, Sri Lanka	It brings together recent developments in both practice and understanding of social behavioural Change Communication to prevent HIV. The improvement of versatility and the sophistication of social behavioural change communication in prevention of HIV has been coming into common use worldwide, and its application is really necessary.	Behavioural change	https://sbccimplementationkits.org/sbcc-in-emergencies/learn-about-sbcc-and-emergencies/what-is-social-and-behavior-change-communication/	Website
	94	Pre-exposure prophylaxis (PrEP)	National Center for HIV/AIDS	United States of America	PrEP is the use of antiretroviral medicines by HIV-negative individuals to avoid HIV infection.PrEP is highly effective when taken, but it has not worked where adherence was low (96	Diagnostics	https://www.cdc.gov/hiv/basics/prep.html	Website
	95	HIV testing services (HTS)	Baylor College of Medicine Childrens Foundation	Uganda	HIV testing services can be a critical entry point for other prevention communication and tools.	Prevention	https://www.who.int/publications/i/item/978-92-4-155058-1	Website
	96	VMMC Devices	Global Advocacy for HIV Prevention	Mozambique	Promoting the scale up of VMMC in priority countries can be a critical contributor to reducing HIV prevalence among young women, but population-level effects will only gradually increase over time, because most men accessing VMMC are from younger age groups than the sexual partners of adolescent girls and young women.	Strategic information	https://www.avac.org/blog/introducing-innovation-role-devices-vmmc	Website
	97	HIV Websites and Databases	U.S. Department of Veterans Affairs	United States of America	Much of the information on the Internet is valuable and is being used by people to inform themselves about their own health. However, there are concerns that people may be at risk of being overwhelmed or misinformed when seeking health information in this way. As a result, a number of organisations such as America’s National Institute of Health have issued guidelines on how to evaluate whether a …	Access services	https://www.hiv.va.gov/web-resources/hiv-web-sites.asp	Website
	98	Life4me+	Life4me.plus	Switzerland	Life4me+ reminds you about appointments and medications. The app helps users stay in touch with doctors through the app, and saves test results and prescription history. The app also brings news about HIV and other conditions wher it reports cases of discrimination, stock-out in provision of drugs, and monitor quality of medical care through health systems and other agencies around the world.	Behavioural change	https://life4me.plus/en/about-us/	Website
	99	HIV Oral PrEP	World Health Organisation	United States of America	HIV Oral PrEP includes guidelines from the World Health Organization (WHO) about the best ways to get and use PrEP. It has information for those taking PrEP and those considering taking it, as well as for doctors, counselors, and pharmacists.	Diagnostics	https://apps.who.int/iris/bitstream/handle/10665/197906/WHO_HIV_2015.48_eng.pdf?sequence=1&isAllowed=y	Website
	100	Be in KNOW	Office of AIDS Research	Germany	Be in the KNOW is a digital brand offering fresh, sex-positive content you can trust. It’s designed to help you understand, discuss and take action to protect your sexual health and answer some of your most pressing questions on relationships, sexual health and HIV.	Access services	https://www.avert.org/about-hiv-aids/glossary	Website
	101	HIV.gov	U.S. Government	United States of America	An information gateway to guide users to Federal HIV information and resources managed by the U.S. Department of Health and Human Services	Strategic information	https://www.hiv.gov/	Website
	102	aidsmap	National AIDS Manual (NAM Publications) in collaboration with the British HIV Association and the International HIV/AIDS Alliance.	United Kingdom	A site featuring a large database of HIV prevention and treatment information for a general audience, as well as a searchable global HIV/AIDS resource directory. Produced by the National AIDS Manual (NAM Publications) in collaboration with the British HIV Association and the International HIV/AIDS Alliance.	Strategic information	https://www.aidsmap.com/	Website
	103	The Body	Remedy Health Media, LLC	United States of America	Community-oriented commercial site with information on prevention and treatment, coverage of major HIV/AIDS conferences, online community discussion threads, and an extensive ask-the-experts feature. Also maintains a companion site, The Body ProLink will take you outside the VA website. VA is not responsible for the content of the linked site., with information for health care providers.	Access services	https://www.thebody.com/	Website
	104	Centers for Disease Control and Prevention Website	Centers for Disease Control and Prevention	United States of America	The site of the Division of HIV/AIDS Prevention of the CDC's National Center for HIV, STDs and TB Prevention. Includes recommendations, guidelines, fact sheets, FAQs, statistics, and materials for prevention and research partners. CDC also maintains the National Center for HIV/AIDS, Viral Hepatitis, STDs, and TB PreventionLink will take you outside the VA website. (NCHHSTP), which features Preven…	Strategic information	https://www.cdc.gov/hiv/default.html	Website
	105	Xpert® HIV-1 Qual Assay	Cepheid AB	United States of America	It is used to diagnose infants in as little as an hour, instead of sending a sample to a laboratory, which can take weeks or months to return a result.	Diagnostics	https://aslm.org/product/xpert-hiv-1-qual/	Website
	106	Alere™ q HIV-1/2 Detect	Cepheid AB	United States of America	It is used to diagnose infants in as little as an hour, instead of sending a sample to a laboratory, which can take weeks or months to return a result.	Diagnostics	https://pdf.medicalexpo.com/pdf/abbott/alere-q-hiv-1-2-detect/67555-177671.html	Website
	107	HIV / AIDS Finger Test App	APKPure.com		Hiv / Aids test app is a quiz tester and a guide that explains how you can escape from contacting HIV aids virus, manage this deadly disease and how you can cope up with friends or family members infected with HIV / AIDS.	Diagnostics	https://m.apkpure.com/hiv-aids-finger-test/com.damuxapp17.hivaidstestguide	Website
	108	Simple AMplification Based Assay (SAMBA)	UNITAID and World Health Organization	Switzerland	SAMBA is a point-of-care nucleic acid detection system that can provide access to viral-load monitoring and early-infant diagnosis of HIV in developing countries.	Diagnostics	https://unitaid.org/project/drw-samba-machines-early-infant-diagnosis/#en	Website
	109	ZIVA™	Cavidi AMP	Sweden	ZIVA™ delivers a fully-automated HIV viral load monitoring system purpose-built to meet the requirements of decentralized labs like those in district hospitals	Diagnostics	https://cavidi.se/clinical-products/ziva-viral-load/	Website
	110	Human PSA-total ELISA Kit	Merck KGaA, Darmstadt	Germany	This kit is an in vitro enzyme- linked immunosorbent assay for the quantitative measurement of human PSA-total in serum, plasma, cell culture supernatants and urine.	Diagnostics	https://www.sigmaaldrich.com/catalog/product/sigma/rab0331?lang=en&region=UG&gclid=Cj0KCQjw0oCDBhCPARIsAII3C_F3tn4KxY4VolP2cxlOdSFobyc0zxexiZThyYUtu2trmEHfHNtikSAaAqx0EALw_wcB	Website
	111	Chembio DPP® HIV-Syphilis Assay	Chembio Diagnostics, Inc	Germany	It is a CE-Marked, dual rapid test for the detection of antibodies to HIV 1/2 and Treponema pallidum in fingerstick whole blood, venous whole blood, serum, or plasma specimens.	Diagnostics	https://chembio.com/products/dpp-hiv-syphilis-assay-europe/	Website
	112	Sisters with a Voice, programme	CENTRE FOR SEXUAL HEALTH AND HIV/AIDS RESEARCH	ZIMBABWE	It is a programme that provides services for sex workers on behalf of the National AIDS Council.	Strategic information	https://sisters-zimbabwe.org/	Website
	113	LINKAGES project	The Centre for the Development of People (CEDEP)	MALAWI	Strengthening linkages with health providers and reducing stigma for men who have sex with men. It was introduced to promote human rights, health and social development for minority populations. One of their projects provides services for men who have sex with men in an environment where homophobia and criminalization of same sex practices marginalize the community, limiting access to services.	Strategic information	https://www.fhi360.org/sites/default/files/media/documents/resource-linkages-malawi-achievements.pdf	Website
	114	Services and programmes reaching prisoners and sex workers	EXCELLENCE AND FRIENDS MANAGEMENT CARE CENTRE	NIGERIA	Excellence and Friends Management Care Centre (EFMC) is a non-governmental community-based organization that works with people in prison and sex workers, as well as the general population. Programmes and services are provided primarily in the states of Nasarawa and Imo and in the Federal Capital Territory and City of Abuja	Strategic information	https://efmcglobal.org/	Website
	115	SHARPER project- Rapid Community Response system	. FHI 360	GHANA	The Rapid Community Response system in Ghana is a system that provides an interface for key populations and people living with HIV to access appropriate health, legal and police protection when abused, threatened or harmed. This is where contracted known members of the community of men who have sex with men as community liaison officers (CLO) to engage other men who have sex with men through soci…	Strategic information	https://www.fhi360.org/taxonomy/term/2204	Website
	116	MOSAIC Men’s Health Initiative	ICAP( the International Center for AIDS Care and Treatment Programmes)	South Africa	The programme supports organizations serving the community of men who have sex with men to develop peer led outreach and community-based HIV prevention activities together with the ICAP regional and technical teams.	Strategic information	http://www.anovahealth.co.za/uploads/documents/Lebowa_Malaka_ICAP_ANOVA_Top2Bottom_Symposium_Program_Impact_in_Limpopo.pdf	Website
	117	Sexual and reproductive health and social services	The National Organization of Peer Educators (NOPE)	KENYA	The National Organization of Peer Educators (NOPE) provides sexual and reproductive health and social services in a wide variety of settings. NOPE developed the Drop-in Service Centre (DiSC) model as a ‘one-stop’ approach for delivery of essential HIV services for female sex workers and men who have sex with men in seven locations in Kisii and Kiambu counties.	Strategic information	https://www.facebook.com/nopeafrica/	Website
	118	Combination prevention programme for sex workers and their clients	Re-Action	SOUTH AFRICA	Re-Action! created an enabling environment to support clinical and behavioural prevention interventions for sex workers in South Africa	Strategic information	https://www.Re-action.co.Za	Website
	119	Sexual and reproductive health (SRH) and HIV services	REPRODUCTIVE HEALTH UGANDA	UGANDA	The programme operates a peer-led, community-based programme to provide a comprehensive package of HIV testing and HIV services including mobile and home-based HIV testing. Services include sexually transmitted infections (STI) screening and management, family planning services, substance use counselling, male and female condom distribution, consultation and referral for post-exposure prophylaxis…	Access services	https://www.rhu.or.ug/	Website
	120	Sex Workers Outreach Programme (SWOP)	SEX WORKERS OUTREACH PROGRAMME	KENYA	The Sex Workers Outreach Programme (SWOP) promotes the health, safety and wellbeing of sex workers in Nairobi County and affirms their occupational and human rights.	Access services	https://swopke.blogspot.com	Website
	121	Strengthening HIV Prevention, Care and Treatment among Key Populations	SOCIETY FOR FAMILY HEALTH	NAMIBIA	This project aims at Improving access to HIV prevention, care and treatment interventions, Building capacity of local peer-led organizations to provide HIV testing services;	Access services	http://sfh.org.na/	Website
	122	Integrated approach to sensitize health-care providers on issues affecting key populations and to empower public health	South African National AIDS Council (SANAC) and the Department of Health	South Africa	It has developed an integrated approach to sensitize health-care providers on issues affecting key populations and to empower public health staff to interact appropriately (in terms of attitude and clinical expertise) with people from these communities.	Strategic information	https://sanac.org.za/	Website
	123	Mobile health services linked with formal health services to reach key populations	ASSOCIATION IBIS-HIVOS	BOLIVIA	Association Ibis-Hivos developed a mobile health service strategy using trained peer promoters to more easily reach men who have sex with men in locations that are convenient and acceptable. Services include HIV testing and referral for confirmatory testing, risk-reduction counselling, promotion and proper use of condoms, and syphilis testing.	Strategic information	https://hivos.org/program/empowering-key-populations-in-bolivia/	Website
	124	HIV services in an enabling environment for young lesbian, gay, bisexual and transgender clients	CALLEN-LORDE COMMUNITY HEALTH CENTER	United States of America	The programme provides free health care in a transgender-affirming environment for youth who identify as a key population, most of whom are Homeless or at risk of homelessness. Training of all staff (medical providers, nurses, case managers and lay providers) in a transgender-sensitive and competent service manner facilitates this transgender-affirming environment	Access services	https://callen-lorde.org/	Website
	125	PASMO/PSI Combination Prevention Program	USAID	CENTRAL AMERICA	The PASMO/PSI Combination Prevention Program is to increase access to HIV prevention interventions for key populations in six Central American countries.	Prevention	https://www.psi.org/project/usaid-hiv-aids-combination-prevention-program-for-marps-in-central-america-and-mexico/	Website
	126	Client management initiatives for strengthening capacities and coordination	AIDS FOUNDATION EAST-WEST	RUSSIA	AFEW strengthens the capacities of local governmental, non-governmental and community providers, and supports coordination of local service provider networks and resources.	Access services	https.//www.afew.org	Website
	127	HIV Care Tools	Aids Education and Training center	United States of America	The new AETC Program app supports health care providers with point-of-care tools for HIV screening, prevention, and care.	Treatment & Management	https://aidsetc.org/app	Website
	128	AETC and SPNS: HIV/HCV Education	UT Health San Antonio	United States of America	The app is for HIV/HCV treatment providers.	Treatment & Management	https://aetc.uthscsa.edu	Website
	129	HIV Support	myHIV Team	United States of America	myHIVteam is a social network and support group for those living with HIV. Get the emotional support you need from others like you, get practical tips to manage your life with HIV, and insights about treatment or therapies.	Behavioural change	https://www.myhivteam.com/	Website
	130	Poz website	POZ Personals	United States of America	This platform follows in the same footsteps of the likes of dating apps such as Tinder. The only difference is that it is designed specifically for those living with HIV.	Behavioural change	https://www.poz.com/	Website
	131	LiatTM Analyser	F. Hoffmann-La Roche Ltd	United States of America	The LiatTM Analyser is a compact PCR solution that fully automates the PCR process, allowing the rapid accurate analysis of single samples. It delivers premium performance and is ideal for use in point-of-care and satellite locations. It is expertly designed to optimize size, speed, and ease of use.	Diagnostics	https://diagnostics.roche.com/global/en/products/instruments/cobas-liat.html	Website
	132	Gene Xpert® System( GeneXpert® Omni System)	Cepheid	United States of America	A portable near-patient testing molecular diagnostic system that delivers lab quality results when and where they are needed most	Diagnostics	https://www.cepheid.com/en/systems/GeneXpert-Family-of-Systems	Website
	133	HTS, ART, VMMC, communications for men	WHO and UNAIDS VMMC	Botswana, Ethiopia, Kenya, Lesotho, Malawi, Mozambique, Namibia, Rwanda, South Africa, Swaziland, Tanzania, Uganda, Zambia	VMMC services provide therefore a critical opportunity for reaching them with the mix of information and services they most need.	Access services	https://www.who.int/publications/i/item/978-92-4-000854-0	Website
	134	Community mobilization	UNAIDS	Dominican Republic	The organisation has called for particular attention to be given to the social protection and food security needs of people living with HIV who are in economically fragile situations.	Strategic information	https://www.unaids.org/en/keywords/community-mobilization	Website
	135	The U-report youth SMS progamme	UNICEF	Mozambique	An interactive mobile phone and SMS-based programme, U-report provides confidential counselling via SMS and chat.	Strategic information	https://www.unicef.org/innovation/stories/how-sms-prevents-hiv-mozambique	Website
	136	Shuga TV multimedia programme	MTV Staying Alive Foundation	Kenya	The Shuga TV and radio soap opera covers issues of HIV testing, counselling, condom use, positive prevention, gender inequality, sexual violence, transactional sex, alcohol abuse and the role of multiple concurrent partnerships in driving the HIV epidemic. It also maintains an interactive web page and a presence on YouTube.	Strategic information	https://unitaid.org/project/in-africa-a-mass-media-campaign-for-hiv-self-testing-and-prevention-among-youth/#en	Website
	137	Cash transfers and social grants	The AIDS Support Organization(TASO	Uganda	New studies show the promising effects ofcash transfers and other economic incentives for preventing HIV among girls and young women. This has been effective for example in South Africa—where other social grants are available and schooling is already relatively high and protective against HIV	Prevention	https://www.poverty-action.org/study/unconditional-cash-grants-people-with-hivaids-uganda	Website
	138	Toll-free hotline for survivors of sexual violence	Totya Platform	Uganda	Totya Platform provides counseling and peer support groups for victims of sexual violence	Behavioural change	https://www.betterplace.org/en/projects/71294-toll-free-hotline-for-survivors-of-sexual-violence-in-uganda	Website
	139	Antiretroviral Drug Optimization	WHO	Geneva	This publication is intended to serve as a reference tool for countries with limited resources as they develop or revise national guidelines for the use of ART in adults and postpubertal adolescents (see Annex 9 for pubertal Tanner staging; prepubertal adolescents should follow the WHO paediatric guidelines). This list has reduced the number of unnecessary formulations, and become a critical tool…	Access services	https://www.who.int/groups/antiretroviral-drug-optimization	Website

## Sheet: Journal Articles
	Innovation Landscape for HIV services technologies
	No	Authors	Article Title	Year	Country	Summary Abstract	Category	Link	Type
	1	Pontiano Kaleebu Paul Kato Kitandwe Tom Lutalo Aminah Kigozi Christine Watera Mary Bridget Nanteza Peter Hughes Joshua Musinguzi Alex Opio Robert Downing Edward Katongole Mbidde	Evaluation of HIV-1 rapid tests and identification of alternative testing algorithms for use in Uganda	2018	Uganda	This report presents the first ever such evaluation in Uganda, involving both blood and oral based RTs. The role of weak positive (WP) bands on the accuracy of the individual RT and on the algorithms was also investigated. The authors identified three algorithms; Determine + SD Bioline + Statpak; Determine + Statpak + SD Bioline, both with the same sensitivity and specificity of 99.2% and 99.1% r…	Diagnostics	https://bmcinfectdis.biomedcentral.com/articles/10.1186/s12879-018-3001-4	Journal Article
	2	Serge Tonen-Wolyec Jérémie Muwonga Masidi Luc Ferdinand Kamanga Lukusa Gaetan Nsiku Dikumbwa Angèle Sarassoro Laurent Bélec	Analytical Performance of the Exacto Test HIV Self-Test: A Cross-Sectional Field Study in the Democratic Republic of the Congo Strasbourg, France	2020	Republic of Congo	The Democratic Republic of the Congo (DRC) has begun implementing HIV self-testing to boost the first "95" of the UNAIDS 95-95-95 targets by 2025. This study aims to assess the performance and usability of the Exacto Test HIV (Biosynex, Strasbourg, France) self-test in the lab and in the field. The Exacto Test HIV self-test demonstrated high virological performance (sensitivity, 99.6%; specificit…	Diagnostics	https://pubmed.ncbi.nlm.nih.gov/33409330/	Journal Article
	3	Zelda Moran Jilian A. Sacks Francis Kwabena Frimpong Atta Boahen Frimpong Yanis Ben Amor	Performance of the BD-FACS Presto for CD4 count and hemoglobin measurement in a district hospital and rural laboratory in Ghana	2019	Ghana	In Ghana, initiation of Antiretroviral Therapy (ART) is recommended for all patients with an HIV diagnosis, regardless of CD4+ T-cell count. However, measurement of CD4 count remains an important metric for identifying patients with advanced HIV disease, and assessing a person’s overall immune status, which informs the decision to offer opportunistic infection screening and prophylaxis. Access to…	Diagnostics	https://journals.plos.org/plosone/article?id=10.1371/journal.pone.0212684	Journal Article
	4	Lesley E. Scott Jennifer Campbell Larry Westerman Luc Kestens Lara Vojnov Luciana Kohastsu John Nkengasong Trevor Peter Wendy Stevens	Abbott Alere Technologies GmbH, Jena, Germany	2015	Germany	The Alere point-of-care (POC) Pima™ CD4 analyzer allows for decentralized testing and expansion to testing antiretroviral therapy (ART) eligibility. A consortium conducted a pooled multi-data technical performance analysis of the Pima CD4. The Pima CD4 may be recommended using venous-derived specimens for screening (100 cells/μl) for reflex CrAg screening and for HIV ART eligibility at 350 cells/…	Diagnostics	https://bmcmedicine.biomedcentral.com/articles/10.1186/s12916-015-0396-2	Journal Article
	5	Richard A Crosby	State of Condom Use in HIV Prevention Science and Practice	2013	United States of America	Condom use remains as the frontline defense against the HIV/AIDS pandemic. Fortunately, an ever-expanding body of empirical literature is currently guiding improvements in use of this prevention strategy. Recent advances include improved measurement of condom use behaviors, advances in condom effectiveness research, innovations in the design of condoms, and greater intervention efficiency for hig…	Prevention	https://link.springer.com/article/10.1007/s11904-012-0143-7	Journal Article
	6	Priyanka Rani Garg Leena Uppal Sunil Mehra Devika Mehra	Mobile Health App for Self-Learning on HIV Prevention Knowledge and Services Among a Young Indonesian Key Population: Cohort Study	2020	Indonesia	The aim of this study was to assess the role of a peer-customized mobile app based on the principle of self-learning for improving HIV prevention knowledge and access to health services among men who have sex with men, transgender women (known as Waria in Indonesia), and people who use drugs in Indonesia.	Access services	https://mhealth.jmir.org/2020/9/e17646	Journal Article
	7	Bankole Olatosi Jiajia Zhang Sharon Weissman Jianjun Hu Rifat Haider Xiaoming Li	Using big data analytics to improve HIV medical care utilisation in South Carolina: A study protocol	2019	United States of America	Linkage and retention in HIV medical care remains problematic in the USA. Extensive health utilisation data collection through electronic health records (EHR) and claims data represent new opportunities for scientific discovery. Big data science (BDS) is a powerful tool for investigating HIV care utilisation patterns. The South Carolina (SC) office of Revenue and Fiscal Affairs (RFA) data warehou…	Access services	https://bmjopen.bmj.com/content/9/7/e027688	Journal Article
	8	Lisa B. Hightow-Weidman Kathryn E. Muessig Lynn E. Fiellin	The Future of Digital Games for HIV Prevention and Care	2017	United States of America	While there has been a significant increase in mHealth interventions addressing the HIV prevention and care continuum, interventions using game mechanics have been less explored. Digital games are rapidly becoming an important tool for improving health behaviors and supporting the delivery of care and education. The purpose of this review is to provide a historical context for the use of gamifica…	Behavioural change	https://www.ncbi.nlm.nih.gov/pmc/articles/PMC5651998/	Journal Article
	9	Tamara Taggart Mary Elisabeth Grewe Malika Roman Isler	Social Media and HIV: A Systematic Review of Uses of Social Media in HIV Communication	2015	United States of America	Social media, such as Facebook, Twitter and YouTube, provide interactive platforms for individuals, communities and organisations to share and discuss content, debate issues and promote new ideas. As a result, they are changing the dynamics and nature of interactions between healthcare consumers, health workers and health care organisations. The objective of this paper is to present a comprehensi…	Access services	https://www.ncbi.nlm.nih.gov/pmc/articles/PMC4642795/	Journal Article
	10	SESH Study Group Joseph D. Tucker	Crowdsourcing to promote HIV testing among MSM in China: study protocol for a stepped wedge randomized controlled trial	2017	China	HIV testing for marginalized populations is critical to controlling the HIV epidemic. However, the HIV testing rate among men who have sex with men (MSM) in China remains low. Crowdsourcing, the process of shifting individual tasks to a group, has been increasingly adopted in public health programs and may be a useful tool for spurring innovation in HIV testing campaigns. The authors designed a m…	Access services	https://trialsjournal.biomedcentral.com/articles/10.1186/s13063-017-2183-1	Journal Article
	11	Iván C. Balán Javier Lopez-Rios Samiksha Nayak Cody Lentz, Siddarth Arumugam, Bryan Kutner, Curtis Dolezal, Ongun Uzay Macar, Tejit Pabari, Alexander Wang Ying Michael Okrah Samuel K. Sia	SMARTtest: A Smartphone App to Facilitate HIV and Syphilis Self- and Partner-Testing, Interpretation of Results, and Linkage to Care	2019	Switzerland	Acceptability of rapid HIV self-testing is high but potential users remain concerned about correct use, interpretation of test results, and linkage to care. This article describes user preferences for a smartphone app to mitigate these challenges and how these were integrated into the SMARTtest app to support self- and partner-testing using the INSTI Multiplex®. Sixty men and transgender women wh…	Diagnostics	https://link.springer.com/article/10.1007/s10461-019-02718-y	Journal Article
	12	Yao Zhang Xiaoming Li	Uses of information and communication technologies in HIV self-management: A systematic review of global literature	2016	Australia and United States of America	Information and Communication Technology (ICT) has been applied increasingly in supporting human immunodeficiency virus (HIV) prevention and treatment. The technological advances have extended to the field of HIV self-management. The objectives of this paper are to examine the design and use of ICTs in HIV self-management programs, to identify the knowledge gaps in existing practice, and to provi…	Access services	https://www.sciencedirect.com/science/article/pii/S0268401216307885?via%3Dihub	Journal Article
	13	Benjamin Marent Flis Henwood Mary Darking EmERGE Consortium	Ambivalence in digital health: Co-designing an mHealth platform for HIV care	2018	United Kingdom	In reaction to polarised views on the benefits or drawbacks of digital health, the notion of ‘ambivalence’ has recently been proposed as a means to grasp the nuances and complexities at play when digital technologies are embedded within practices of care. This article responds to this proposal by demonstrating how ambivalence can work as a reflexive approach to evaluate the potential implications…	Strategic information	https://www.sciencedirect.com/science/article/pii/S0277953618304799?via%3Dihub	Journal Article
	14	Lynne C. Messer Heather Parnell Renee Huffaker Rich Wooldredge Aimee Wilkin	The development of a health information exchange to enhance care and improve patient outcomes among HIV+ individuals in rural North Carolina	2012	United States of America	The Regional Health Information Integration Project (RHIIP) has developed the Carolina HIV Information Cooperative regional health information organization (CHIC RHIO). The CHIC RHIO was implemented to improve patient care and health outcomes by enhancing communication among geographically disconnected networks of HIV care providers in rural North Carolina. CHIC RHIO comprises one medical clinic …	Strategic information	https://www.sciencedirect.com/science/article/pii/S1386505612001360?via%3Dihub	Journal Article
	15	S.A. El-Safty, M.A. Shenashen	Nanoscale dynamic chemical, biological sensor material designs for control monitoring and early detection of advanced diseases	2020	Japan	This review reports an overview of biosensor designs and their feasibility for early investigation, detection, and quantitative determination of many advanced diseases. Biosensor strategies are highlighted to demonstrate the influence of nanocompact and lightweight designs on accurate analyses and inexpensive sensing assays. To date, the effective and foremost developments in various nanodynamic …	Diagnostics	https://www.sciencedirect.com/science/article/pii/S2590006420300041?via%3Dihub	Journal Article
	16	Radhay Shyam Gupta, Kiran Yewale, Asha S. Hegdea, Tejas Mulika, Manish Bamrotiya, Surendra Yadav, Tushar Rane, Kushalsinh Pardeshi, Sudha Balakrishnan, and D.C.S. Reddy	Use of technology in follow-up of HIV positive pregnant women and their babies till 18 months of age- an innovation by Maharashtra State AIDS Control Society (MSACS), India	2016	India	The purpose of this study is to assess the utility of web-based mobile technology monitoring tool, for ensuring linkages, and tracking of HIV-exposed child until 18 months of age. The ‘early infant diagnosis (EID) Follow-up System’ was designed as a tool for reminding the field level staff for follow-up of HIV-exposed babies. Using Java Swing Framework, software was developed which generates auto…	Access services	https://journals.lww.com/co-hivandaids/Fulltext/2016/03001/Use_of_technology_in_follow_up_of_HIV_positive.7.aspx#:~:text=The%20purpose%20of%20this%20study%20is%20to%20assess,field%20level%20staff%20for%20follow-up%20of%20HIV-exposed%20babies.	Journal Article
	17	Jayoti Rana, Ann N. Burchell, Susan Wang, Carmen H. Logie, Ryan Lisk and Dionne Gesink*	Community perspectives on ideal bacterial STI testing services for gay, bisexual, and other men who have sex with men in Toronto, Canada: a qualitative study	2022	Canada	Innovation is needed to produce sustained improvements in bacterial sexually transmitted infections (STI) testing given suboptimal access and uptake among sexually active gay, bisexual or other men who have sex with men (GBM). Yet, the STI testing processes and technologies that best address local testing barriers among GBM in Toronto is unknown. The study explored men’s perspectives regarding ST…	Access services	https://bmchealthservres.biomedcentral.com/articles/10.1186/s12913-022-08529-7	Journal Article
	18	Nora Engel	Aligning in the dark: Variable and shifting (user-) settings in developing point-of-care diagnostics for tuberculosis and HIV	2010	Netherlands	To be effective, healthcare technologies should be attuned to particular contexts of use. This article examines how such attuning is articulated in global innovation practices for tuberculosis and HIV diagnostics, and to what effect. It examines the development of point-of-care (POC) diagnostics – promised to be designed for users outside laboratories or in resource constrained settings – to stud…	Access services	https://journals.sagepub.com/doi/10.1177/0306312719900545	Journal Article
	19	Jennifer Cable, Padmini Srikantiah, James E. Crowe Jr., Bali Pulendran, Adrian Hill, Ann Ginsberg, Wayne Koff, Anuja Mathew, Tony Ng, Kathrin Jansen, Gregory Glenn, Sallie Permar, Ian Wilson,David B.Weiner, Drew Weissman, and Rino Rappuoli	Vaccine innovations for emerging infectious diseases—a symposium report	2019	United States of America	Vaccines have been incredibly successful at stemming the morbidity and mortality of infectious diseases worldwide. However, there are still no effective vaccines for many serious and potentially preventable infectious diseases. Advances in vaccine technology, including new deliverymethods and adjuvants, as well as progress in systems biology and an increased understanding of the human immune syst…	Strategic information	https://nyaspubs.onlinelibrary.wiley.com/doi/10.1111/nyas.14235	Journal Article
	20	Pamela Kohler, Kawango Agot, Irene N Njuguna, Jessica Dyer, Jacinta Badia, Wenwen Jiang , Kristin Beima-Sofie, Nok Chhun , Irene Inwani, Seema K Shah,Barbra A Richardson, Nahida Chaktoura, Grace John-Stewart	Data-informed stepped care to improve youth engagement in HIV care in Kenya: a protocol for a cluster randomised trial of a health service intervention	2022	United States of America	Adolescents and youth living with HIV (AYLHIV) have lower retention in care, adherence to treatment, and viral suppression compared with adults. Stepped care is a process by which clients are assigned to increasingly intensive services or ‘steps’ according to level of need. Differentiated care, in which stable clients access less frequent services, can be combined with stepped care to align needs…	Access services	https://bmjopen.bmj.com/content/12/10/e062134	Journal Article
	21	Daniel Grace, Malcolm Steinberg, Michael Kwag, Sarah A. Chown, Glenn Doupe, Terry Trussler, Michael Rekart, and Mark Gilbert	Diagnostic Technologies in Practice: Gay Men’s Narratives of Acute or Recent HIV Infection Diagnosis	2015	United Kingdom	Diagnosing HIV-positive gay men through enhanced testing technologies that detect acute HIV infection (AHI) or recent HIV infection provides opportunities for individual and population health benefits. We recruited 25 men in British Columbia who received an acute (n = 13) or recent (n = 12) HIV diagnosis to engage in a longitudinal multiplemethods study over one year or longer. Our thematic analy…	Diagnostics	https://journals.sagepub.com/doi/10.1177/1049732314549813	Journal Article
	22	Sidwell Matlala	Educators’ perceptions and views of problem-based learning through simulation	2021	South Africa	The real-world problems and ever-changing challenges currently confronting the future of nursing education and healthcare require a problem-based learning approach using simulation strategy. This is exacerbated by the increasing burden of diseases such as tuberculosis, human immunodeficiency virus and acquired immune deficiency syndrome (HIV and AIDS) and more recently the coronavirus disease 201…	Strategic information	http://www.scielo.org.za/scielo.php?script=sci_abstract&pid=S2223-62792021000100005&lng=en	Journal Article
	23	Catherine S. Todd, Stephen J. Mills, and Anh L. Innes	Electronic health, telemedicine, and new paradigms for training and care	2017	United States of America	HIV prevention and care is changing rapidly; guideline revisions and programmatic scale-up require innovative approaches to in-service training and care extension to improve provider practice and care access. We assessed recent (_x0002_12 months) peer-reviewed publications on electronic health (eHealth), telemedicine, and other innovative provider-targeted interventions for HIV-related care. Key …	Strategic information	https://journals.lww.com/co-hivandaids/Fulltext/2017/09000/Electronic_health,_telemedicine,_and_new_paradigms.9.aspx	Journal Article
	24	Deborah SK Thomas, Kristen Daly , Elias C Nyanza, Sospatro E Ngallaba and Sheana Bull	Health worker acceptability of an mHealth platform to facilitate the prevention of motherto- child transmission of HIV in Tanzania	2020	Tanzania	Health workers (HWs) are increasingly using mobile health (mHealth) technologies in low-resource settings. Understanding HW acceptability of mHealth is critical to increasing the scale of mHealth solutions. We examined pre- and post-pilot clinical knowledge and acceptability of a tablet-based platform, the Tanzania Health Information System (T-HIT), targeting HWs delivering prevention of mother-t…	Strategic information	https://journals.sagepub.com/doi/10.1177/2055207620905409	Journal Article
	25	Kasey Claborn, Sara Becker, Susan Ramsey, Josiah Rich & Peter D. Friedmann	Mobile technology intervention to improve care coordination between HIV and substance use treatment providers: development, training, and evaluation protocol	2017	United States of America	People living with HIV (PLWH) with a substance use disorder (SUD) tend to receive inadequate medical care in part because of a siloed healthcare system in which HIV and substance use services are delivered separately. Ideal treatment requires an interdisciplinary, team-based coordinated care approach, but many structural and systemic barriers impede the integration of HIV and SUD services. The cu…	Access services	https://ascpjournal.biomedcentral.com/articles/10.1186/s13722-017-0073-1	Journal Article
	26	Alash’le Abimiku, Ralph Timperi & William Blattner	Laboratory Innovation Towards Quality Program Sustainability	2016	United States of America	Laboratory innovation significantly affects program sustainability of HIV programs in low and middle income countries (LMICs) far beyond its immediate sphere of impact. Innovation in rapid development of diagnostic technologies, improved quality management systems, strengthened laboratory management, affordable external quality assurance and accreditation schemes, and building local capacity have…	Diagnostics	https://link.springer.com/article/10.1007/s11904-016-0323-y	Journal Article
	27	Anna K. Radin, Andrew A. Abutu, Margaret Achom Okwero, Michelle R. Adler, Chukwuma Anyaike et al	Confronting Challenges in Monitoring & Evaluation: Innovation in the Context of the Global Plan Towards the Elimination of New HIV Infections Among Children by 2015 and Keeping Their Mothers Alive	2017	Uganda	The Global Plan Towards the Elimination of New HIV Infections Among Children by 2015 and Keeping Their Mothers Alive (Global Plan), which was launched in 2011, set a series of ambitious targets, including a reduction of new HIV infections among children by 90% by 2015 (from a baseline year of 2009) and AIDS-related maternal mortality by 50% by 2015.1 To reach these targets, the Global Plan called…	Access services	https://www.ncbi.nlm.nih.gov/pmc/articles/PMC5407381/	Journal Article
	28	Ianka Cristina Celuppi, Betina Hörner Schlindwein Meirelles, Veridiana Tavares Costa, Denise Elvira Pires de Pires	Practical Approach to Care Kit: Innovation for nurses’ clinical practice in HIV management	2023	Brazil	To analyze the use of the Practical Approach to Care Kit as a technology adopted in nurses’ clinical practice for HIV management in Primary Health Care. An exploratory and descriptive research study anchored in the methodological framework of the Constructivist Grounded Theory. The participants were defined through initial sampling, with 12 nurses, and theoretical sampling, with five managers, to…	Access services	https://www.scielo.br/j/rlae/a/7K4crcXFpLjJsYc7zQvH3KS/?lang=en	Journal Article
	29	Simone J Skeen, Demetria Cain, Kristi E Gamarel, Lisa Hightow-Weidman, Cathy J Reback	mHealth for transgender and gender-expansive youth: harnessing gender-affirmative cross-disciplinary innovations to advance HIV prevention and care interventions	2021	United States of America	Transgender and gender-expansive (TGE) youth endure stark disparities in health and wellbeing compared to their cisgender peers. A key social determinant of health for TGE adolescents and emerging adults is gender affirmation, which encompasses multidimensional validations of an individual's lived gender. Lacking available resources for one's gender affirmation, TGE young people may engage in hig…	Access services	https://mhealth.amegroups.com/article/view/48101/html	Journal Article
	30	Gavin Brown and Cesare Di Feliciantonio	Geographies of PrEP, TasP and undetectability: Reconceptualising HIV assemblages to explore what else matters in the lives of gay and bisexual men	2022	United Kingdom	Recent biomedical innovations in the field of HIV prevention and treatment – namely PrEP, TasP, and ‘undetectability’ – have completely reshaped the experience of living with HIV, as well as the meanings of ‘risk’ and ‘safety’ in relation to sexual practices, leading to new forms of pleasure and sociality for gay and bisexual men in the Minority World. While human geographers have been slow to en…	Access services	https://journals.sagepub.com/doi/full/10.1177/2043820621989574	Journal Article
	31	Graham F. Watts Sr, M. Maximillion Wilson & Heather Vaughan	HIV telehealth: framing the dialog and debate for reaching community consensus	2019	United States of America	Telehealth is a promising innovation in HIV care and services. It holds promise to leverage health information technology, (HIT), for expanding the benefits of treatment to underserved groups and Persons Living With HIV/AIDS, (PLWHA) dwelling in remote areas. The exploration of telehealth service structure, processes and effects is a useful starting point for clarifying expectations and setting b…	Strategic information	https://link.springer.com/article/10.1007/s12553-019-00310-x	Journal Article
	32	Abigail Baim-Lance, Matthew Angulo, Mary Ann Chiasson, Helen-Maria Lekas , Rachel Schenkel, Jason Villarreal , Anyelina Cantos, Christine Kerr, Aarthi Nagaraja, Michael T Yin, Peter Gordon	Challenges and opportunities of telehealth digital equity to manage HIV and comorbidities for older persons living with HIV in New York State	2022		Older persons living with HIV (PLWH) need routine healthcare to manage HIV and other comorbidities. This mixed methods study investigated digital equity, constituted as access, use and quality, of HIV and specialty telehealth services for PLWH > 50 years during the initial wave of the COVID-19 pandemic when services transitioned to remote care. Telehealth access and use were shaped by multiple re…	Strategic information	https://bmchealthservres.biomedcentral.com/articles/10.1186/s12913-022-08010-5	Journal Article
	33	David Oladele , Juliet Iwelunmor , Titilola Gbajabiamila et al	The 4 Youth By Youth mHealth Photo Verification App for HIV Self-testing in Nigeria: Qualitative Analysis of User Experiences	2021	Nigeria	Despite the global expansion of HIV self-testing (HIVST), many research studies still rely on self-reported outcomes. New HIVST verification methods are needed, especially in resource-limited settings. This study aims to evaluate the user experience of a mobile health (mHealth) app to enhance HIVST result reporting and verification. Semistructured, in-depth interviews were used to evaluate the us…	Diagnostics	https://www.ncbi.nlm.nih.gov/pmc/articles/PMC8663582/pdf/formative_v5i11e25824.pdf	Journal Article
	34	Taiyin Yang, Reza Oliyai, Kenneth M Kent	The making of the one pill—Developing single tablet regimens for HIV and for HCV	2022	United States of America	A concept of “all or nothing” inspired the innovation of a one-pill-once-daily HIV treatment. Atripla® was the one pill that combined efavirenz, emtricitabine, and tenofovir disoproxil fumarate to become the first daily single tablet regimen that forever simplified HIV treatment to enhance patient compliance and thus, sustained viral suppression. The making of Atripla incorporated dry granulation…	Treatment & Management	https://pubmed.ncbi.nlm.nih.gov/35491563/	Journal Article
	35	Caroline A Bulstra, Jan AC Hontelez, Osondu Ogbuoji &Till Bärnighausen	Which delivery model innovations can support sustainable HIV treatment?	2019	Germany	The rapid scale-up of antiretroviral treatment (ART) for HIV since the mid-2000s, mostly through disease-specific or “vertical” programmes, has been a highly successful undertaking, which averted millions of deaths and prevented many new infections. However, the dynamics of the HIV epidemic and changing political and financial commitment to fight the disease will likely require new models for the…	Strategic information	https://www.tandfonline.com/doi/abs/10.2989/16085906.2019.1686033	Journal Article
	36	Fatima Laher, Taibat Salami, Stefanie Hornschuh, Lerato M. Makhale, Mamakiri Khunwane, Michele P. Andrasik, Glenda E. Gray Hong Van Tieu and Janan J. Dietrich	Willingness to use HIV prevention methods among vaccine efficacy trial participants in Soweto, South Africa: discretion is important	2020	South Africa	Despite multiple available HIV prevention methods, the HIV epidemic continues to affect South Africa the most. We sought to understand willingness to use actual and hypothetical HIV prevention methods among participants enrolled in a preventative HIV vaccine efficacy trial in Soweto, South Africa. The authors conducted a qualitative study with 38 self-reporting HIV-uninfected and consenting 18–35…	Strategic information	https://bmcpublichealth.biomedcentral.com/articles/10.1186/s12889-020-09785-0	Journal Article
	37	Kevon-Mark P Jackman; Jeremy Kane; Hadi Kharrazi; Renee M Johnson; Carl Latkin	Using the Patient Portal Sexual Health Instrument in Surveys and Patient Questionnaires Among Sexual Minority Men in the United States: Cross-sectional Psychometric Validation Study	2021	United States of America	Patient portal modules, including electronic personal health records, health education, and prescription refill ordering, may be leveraged to address the sexually transmitted infection (STI) burden, including HIV, among gay, bisexual, and other sexual minority men (SMM). Theoretical frameworks in the implementation sciences highlight examining constructs of innovation attributes and performance e…	Behavioural change	https://www.jmir.org/2021/2/e18750/	Journal Article
	38	Tarandeep Anand, Chattiya Nitpolprasert, and Nittaya Phanuphak	Online-to-Offline (O2O) models in HIV service delivery	2018	Thailand	Half the world’s population has access to Internet and technologies, and utilization is near-ubiquitous among providers and key populations. Despite being so well connected; identifying, reaching and linking vulnerable populations to HIV clinical services remains a global challenge. This review highlights the emerging online-to-offline (O2O) models, their potential in scaling-up services, and eva…	Access services	https://www.ncbi.nlm.nih.gov/pmc/articles/PMC5642119/	Journal Article
